# Supplementary material for: Pet Owners’ Attitudes and Opinions towards Cat and Dog Care Practices in Aotearoa New Zealand
Source: MDPI journal article supplement (doi:10.3390/vetsci10100606), 2023-10-04
Supplement: s1 [file s1]

Three supplementary figures and three supplementary tables.

*Supplementary Figure S1. Percentage of 2019 New Zealand Pet Survey respondents selecting each level of agreement for the “Dogs should...” statements regarding pet care.*

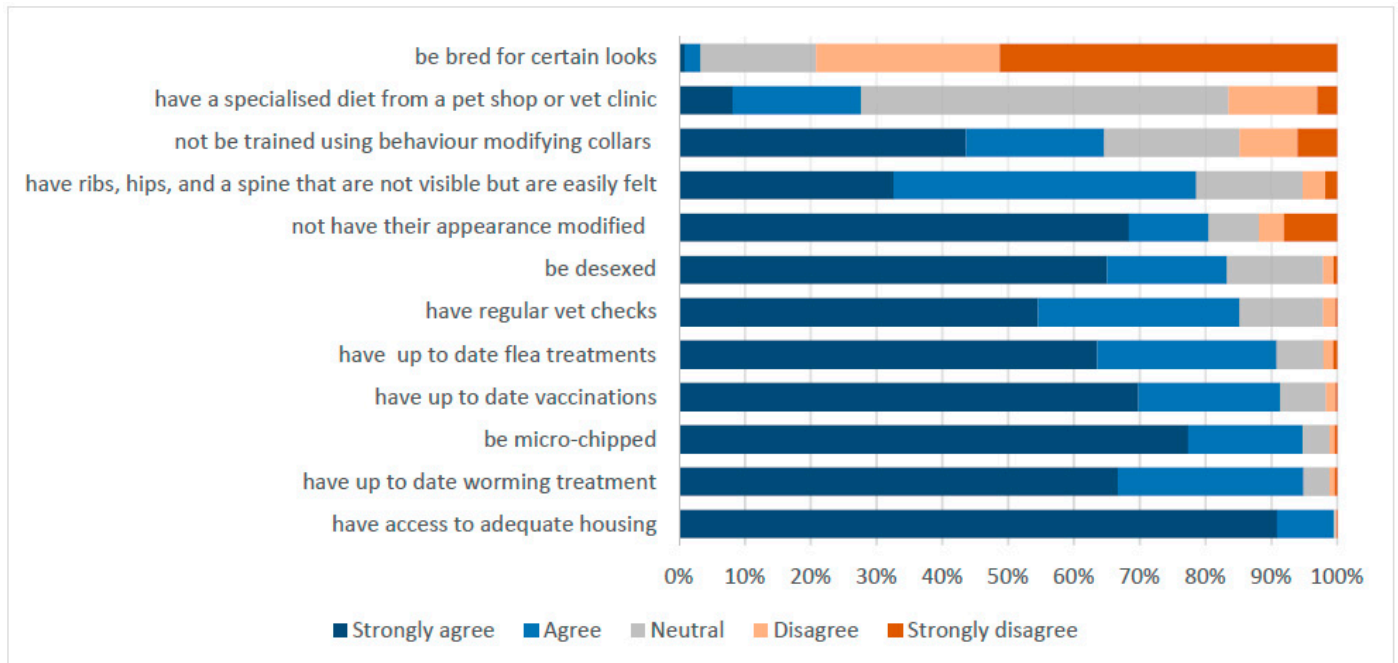

*Supplementary Figure S2. Percentage of 2019 New Zealand Pet Survey respondents selecting each level of agreement for the “Cats should...” statements regarding pet care.*

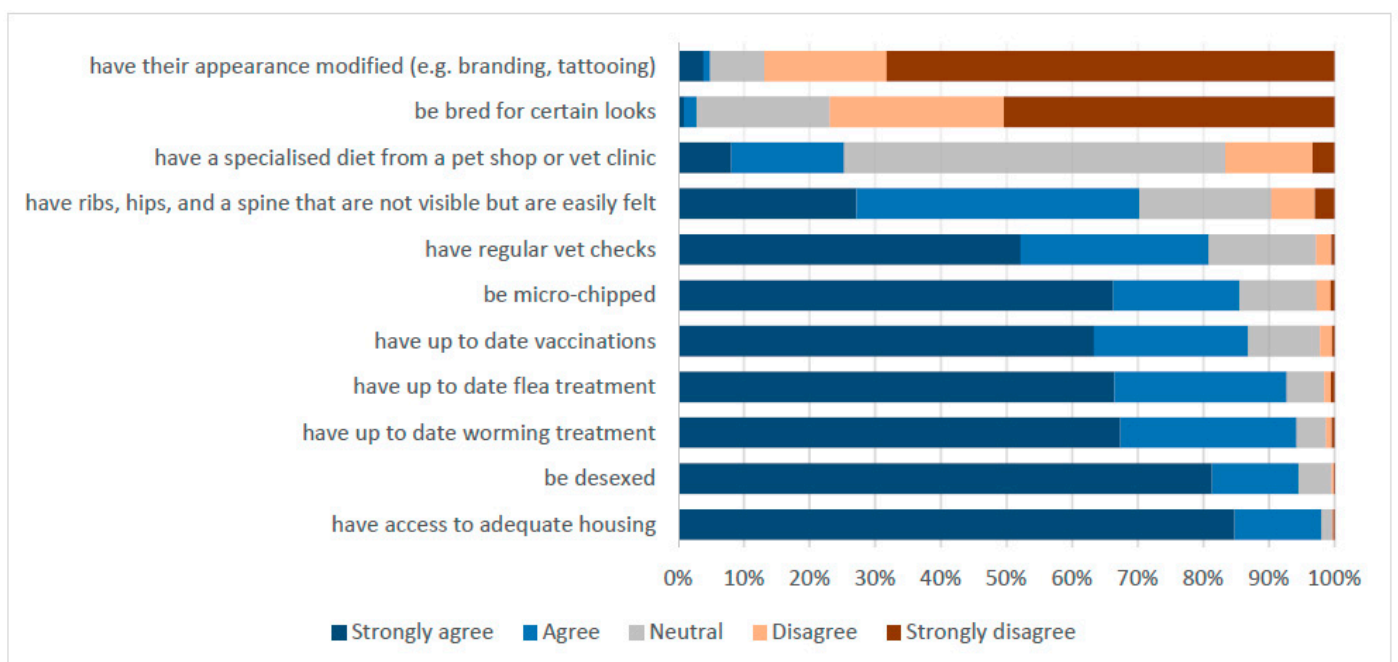

Supplementary Figure S3. Dog versus cat owner response: Differences in the percentage of positive responses (strongly agree and agree\*) for each of the pet care statements.

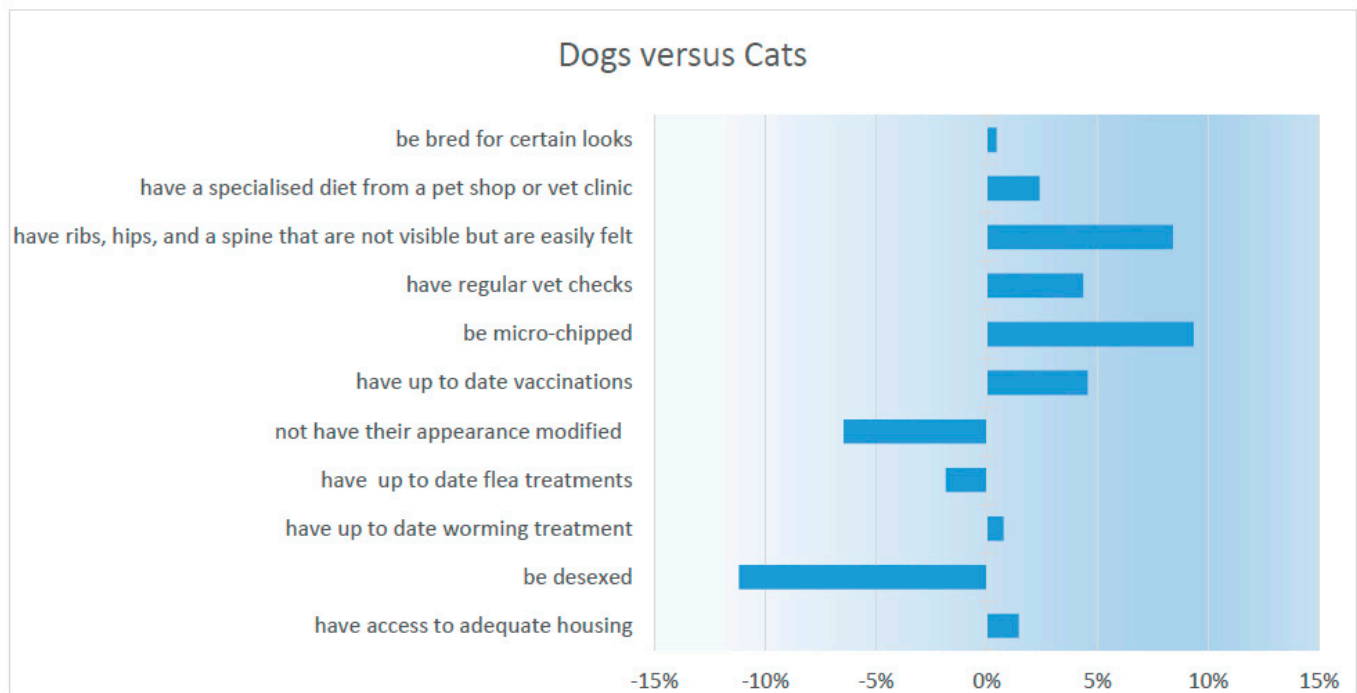

\*The appearance modification phrase for cats was "Should have their appearance modified" therefore the strongly disagree and disagree percentages were compared to the strongly agree and agree percentages for dogs where the phrase was "Should not have their appearance modified".

*Supplementary Table S1: Demographic questions from the Furry whānau wellbeing: Working with local communities for positive pet welfare outcomes survey.*

| Question                                                                               | Possible Responses                                                                                                                                                                                                                                                                                                                                                                                        |
|----------------------------------------------------------------------------------------|-----------------------------------------------------------------------------------------------------------------------------------------------------------------------------------------------------------------------------------------------------------------------------------------------------------------------------------------------------------------------------------------------------------|
| Are you?                                                                               | Female, Male, Gender Diverse                                                                                                                                                                                                                                                                                                                                                                              |
| To which ethnic group do you belong? Tick as many as apply:                            | NZ European, Other European, Māori, Samoan, Cook Island Māori, Tongan, Niuean, Chinese, Indian, Don't know, Other (please specify)                                                                                                                                                                                                                                                                        |
| To which age range do you belong?                                                      | 18-24 years, 25-34 years, 35-44 years, 45-54 years, 55-64 years, 65-74 years, 75-84 years, 85 years and over                                                                                                                                                                                                                                                                                              |
| In which region do you currently live?                                                 | Northland, Auckland, Bay of Plenty, Waikato, Taranaki, Gisborne, Hawke's Bay, Manawatu-Wanganui, Wellington, Nelson, Marlborough, Tasman, West Coast, Canterbury, Otago, Southland, Other (please specify)                                                                                                                                                                                                |
| In the last 12 months, what was your total household income?                           | Less than \$14,000, \$14,001-48,000, \$48,001-70,000, \$70,001-100,000, Over \$100,000, Would rather not say                                                                                                                                                                                                                                                                                              |
| What is your highest completed qualification?                                          | National Certificate level 1, National Certificate level 2, National Certificate level 3, National Certificate level 4, Trade certificate, Diploma or Certificate level 5, Advanced trade certificate, Diploma or Certificate level 6, Teachers Certificate or Diploma, Nursing Diploma, Bachelor Degree, Bachelor (Hons), Postgraduate Certificate/Diploma, Master's Degree, PhD, Other (please specify) |
| Including yourself, how many adults (over 18 years of age) live at your usual address? | 0, 1, 2, 3, Other (please specify)                                                                                                                                                                                                                                                                                                                                                                        |
| How many children under 18 years of age live at your usual address?                    | 0, 1, 2, 3, 4, 5, Other (please specify)                                                                                                                                                                                                                                                                                                                                                                  |
| Were you born in New Zealand?                                                          | Yes, No                                                                                                                                                                                                                                                                                                                                                                                                   |
| Where were you brought up? Tick as many as apply:                                      | In a town or city, On a farm or rurally, On a lifestyle block, Other (please specify)                                                                                                                                                                                                                                                                                                                     |
| Where do you live now?                                                                 | In a town or city, On a farm or rurally, On a lifestyle block, Other (please specify)                                                                                                                                                                                                                                                                                                                     |
| Do you own a dog?                                                                      | Yes, No                                                                                                                                                                                                                                                                                                                                                                                                   |
| How many dogs do you own?                                                              | 1, 2, 3, 4, Other (please specify)                                                                                                                                                                                                                                                                                                                                                                        |
| Do you own a cat?                                                                      | Yes, No                                                                                                                                                                                                                                                                                                                                                                                                   |
| How many cats do you own?                                                              | 1, 2, 3, 4, Other (please specify)                                                                                                                                                                                                                                                                                                                                                                        |

Supplementary Table S2. Factors associated with the choice selections made by the 2019 NZ Pet Survey respondents regarding the care of dogs.

| Dogs should:                                     | Gender (female versus male)                           | Ethnicity (Māori compared to other ethnicities) | Age range                                                                        | Children (with versus without)                     | Rural upbringing                         | Town/city dwelling                                           |
|--------------------------------------------------|-------------------------------------------------------|-------------------------------------------------|----------------------------------------------------------------------------------|----------------------------------------------------|------------------------------------------|--------------------------------------------------------------|
| Have regular vet checks                          |                                                       | Higher % neutral                                |                                                                                  | Lower % strongly agree; higher % neutral           | Lower % strongly agree; higher % neutral | Higher % strongly agree; lower % neutral                     |
| Have up to date vaccinations                     | Higher % strongly agree; lower % agree                | Higher % neutral                                | 18-24 and 25-34 age range: Higher % strongly agree; lower % agree                | Lower % strongly agree; higher % neutral           | lower % disagree                         | Higher % strongly agree; lower % agree and neutral           |
| Have up to date flea treatments                  |                                                       |                                                 | 18-24 age range: Higher % strongly agree; lower % agree                          | Lower % strongly agree; higher % agree             |                                          | Higher % strongly agree; lower % agree, neutral and disagree |
| Have up to date worming treatment                |                                                       |                                                 | 18-24 age range: Higher % strongly agree; lower % agree                          |                                                    |                                          | Higher % strongly agree; lower % agree and disagree          |
| Be desexed                                       | Higher % strongly agree; lower % agree and neutral    | Lower % strongly agree; higher % neutral        | 18-24 and 25-34 age range: Lower % strongly agree; higher % neutral              | Higher % neutral and disagree                      | Lower % strongly agree; higher % neutral | Higher % strongly agree; lower % disagree                    |
| Be micro-chipped                                 |                                                       | Lower % strongly agree; higher % neutral        |                                                                                  | Lower % strongly agree; higher % agree and neutral |                                          | Higher % strongly agree; lower % agree and neutral           |
| Be bred for certain looks                        |                                                       |                                                 |                                                                                  | Higher % neutral, lower % strongly disagree        |                                          | Lower % agree                                                |
| NOT have their appearance modified               | Higher % strongly agree; lower % neutral              | Lower % strongly agree; higher % neutral        |                                                                                  |                                                    |                                          |                                                              |
| NOT be trained using behaviour-modifying collars | Higher % strongly agree; lower % neutral and disagree |                                                 | 75 - 84 age range: higher % strongly disagree compared to 18-24, 25-34 and 35-44 | Lower % strongly agree; higher % neutral           | Lower % strongly agree; higher % neutral | Higher % strongly agree; lower % neutral                     |
| Have access to adequate housing                  | Higher % strongly agree; lower % agree and neutral    |                                                 |                                                                                  | Lower % strongly agree; higher % agree             |                                          |                                                              |

Supplementary Table S3. Factors associated with the choice selections made by the 2019 NZ Pet Survey respondents regarding the care of cats.

| Cats should:                      | Gender (female versus male)                           | Ethnicity (Māori vs non-Māori)           | Age range                                                                   | Household income                                               | Qualification level               | Children (with versus without)                               | Rural upbringing                         | Town/city dwelling                                           |
|-----------------------------------|-------------------------------------------------------|------------------------------------------|-----------------------------------------------------------------------------|----------------------------------------------------------------|-----------------------------------|--------------------------------------------------------------|------------------------------------------|--------------------------------------------------------------|
| Have regular vet checks           |                                                       | Higher % neutral                         | 35-44: Higher % neutral than 18-24- and 25-34- year age ranges              |                                                                |                                   | Lower % strongly agree; higher % neutral and disagree        | Lower % strongly agree; higher % neutral | Higher % strongly agree, lower % neutral and disagree        |
| Have up to date vaccinations      |                                                       | Higher % neutral                         | 18-24: Higher % strongly agree and lower % neutral than 35-44, 45-54, 55-64 |                                                                |                                   | Lower % strongly agree; higher % neutral                     |                                          | Higher % strongly agree, lower % agree and neutral           |
| Have up to date flea treatments   |                                                       |                                          | 18-24: Higher % strongly agree and lower % agree than 35-44, 45-54, 55-64   | 48-70K: Higher % strongly agree and lower neutral than 70-100K |                                   | Lower % strongly agree; higher % agree and disagree          |                                          | Higher % strongly agree, lower % agree, neutral and disagree |
| Have up to date worming treatment | Higher % strongly agree; lower % neutral and disagree |                                          | 18-24: Higher % strongly agree and lower % agree than 35-44, 45-54, 55-64   | 48-70K: Higher % strongly agree than 70-100K                   |                                   | Lower % strongly agree; higher % disagree                    |                                          | Higher % strongly agree, lower % agree and disagree          |
| Be desexed                        | Higher % strongly agree; lower % agree                | Lower % strongly agree; higher % neutral | 18-24: Lower % strongly agree than 25-34, 35-44, 45-54, 65-74               | 48-70K: Higher % strongly agree and lower neutral than 70-100K |                                   |                                                              |                                          | Higher % strongly agree, lower % agree                       |
| Be micro-chipped                  |                                                       | Lower % strongly agree; higher % neutral | 18-24 and 25-34: Higher % strongly agree than 55-64                         |                                                                | >level 7: higher % strongly agree | Lower % strongly agree; higher % agree, neutral and disagree |                                          | Higher % strongly agree, lower % agree and neutral           |
| Be bred for certain looks         | Higher % strongly disagree, lower % neutral and agree |                                          |                                                                             |                                                                |                                   | Lower % strongly disagree; higher % disagree and neutral     |                                          |                                                              |
| Have their appearance modified    |                                                       |                                          |                                                                             |                                                                |                                   | Higher % disagree, lower % strongly agree                    |                                          |                                                              |
| Have access to adequate housing   | Higher % strongly agree; lower % neutral and          | Lower % strongly agree                   |                                                                             |                                                                |                                   | Lower % strongly agree; higher %                             |                                          |                                                              |

2

3

---

|  |                      |  |  |  |  |                      |  |  |
|--|----------------------|--|--|--|--|----------------------|--|--|
|  | strongly<br>disagree |  |  |  |  | agree and<br>neutral |  |  |
|--|----------------------|--|--|--|--|----------------------|--|--|
